# Supplementary material for: Enhanced microphase separation of thin films of low molecular weight block copolymer by the addition of an ionic liquid
Source: Royal Society of Chemistry journal article supplement (doi:10.1039/c9sm02039j), 2019-01-01
Supplement: c9sm02039j1.pdf [file c9sm02039j1.pdf]

## **Enhanced Microphase Separation of Thin Films of Low Molecular Weight Block Copolymer by the Addition of an Ionic Liquid**

*Dongxue Li,✧ Chun Zhou,✧ Shisheng Xiong,\* Xin-Ping Qu, Gordon S. W. Craig, and*

*Paul F. Nealey\**

D. Li, Prof. X.-P. Qu

State Key Lab of ASIC and System, School of Microelectronics, Fudan University,  
Shanghai 200433, China

Dr. C. Zhou, Dr. G. S. W. Craig, Prof. P. F. Nealey

Pritzker School of Molecular Engineering, University of Chicago, IL, USA 60637

Email: [nealey@uchicago.edu](mailto:nealey@uchicago.edu)

Prof. S. Xiong

State Key Lab of ASIC and System, School of Information Science and Technology,  
Fudan University, Shanghai 200433, China

Email: [sxiong@fudan.edu.cn](mailto:sxiong@fudan.edu.cn)

## **Supplementary Information**

More SEM images of the fingerprint patterns of BCPs (VSV-47, SV-20, and VSV-26) blending with varied amount of IL are shown here.

(a)

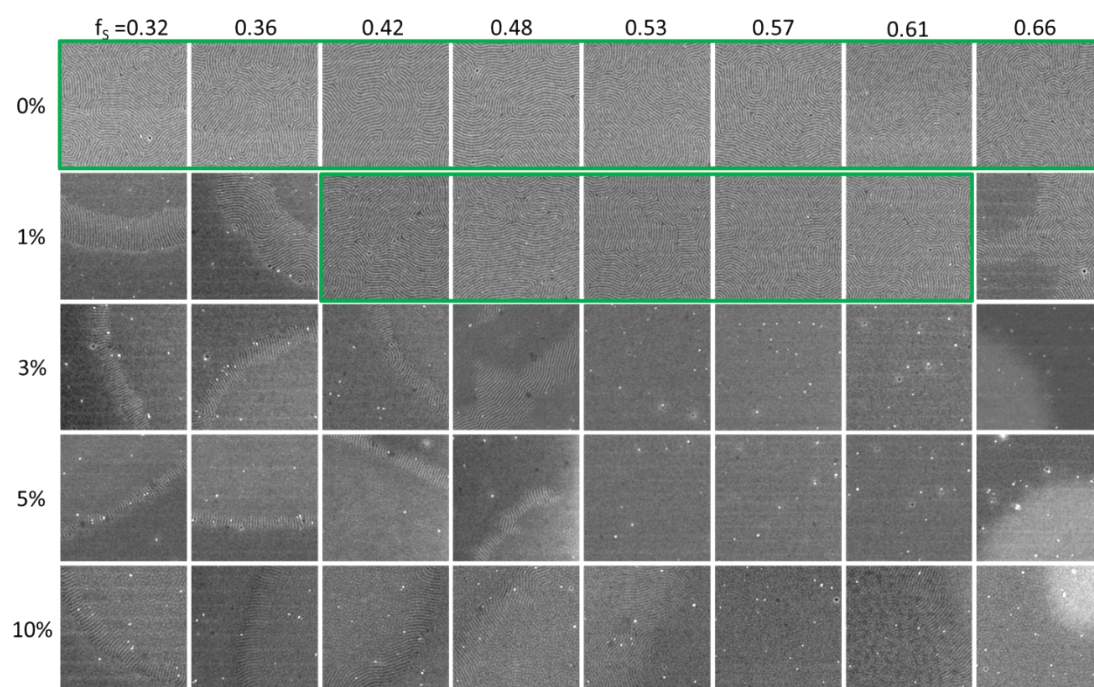

(b)

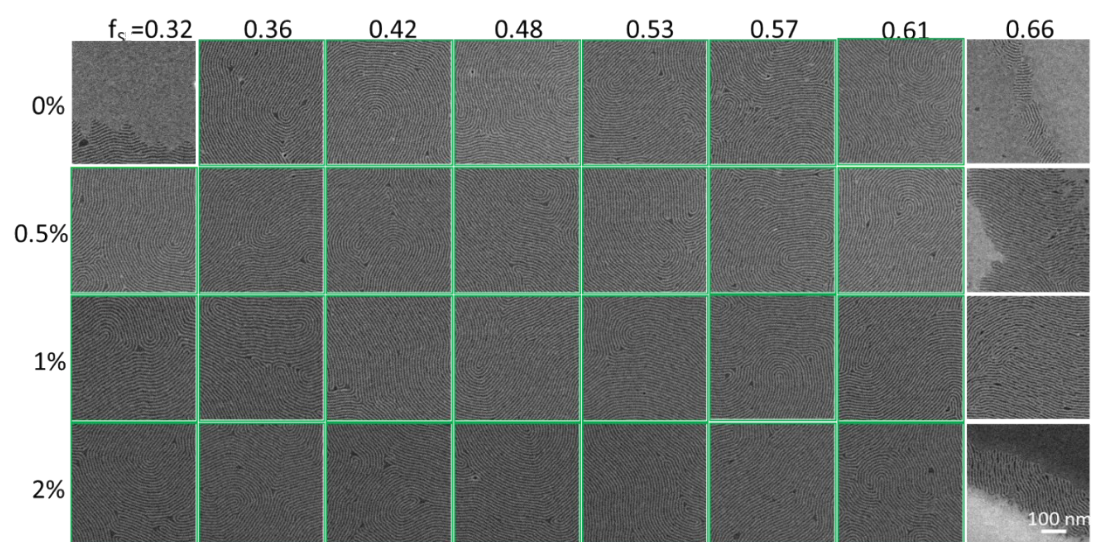



(c)

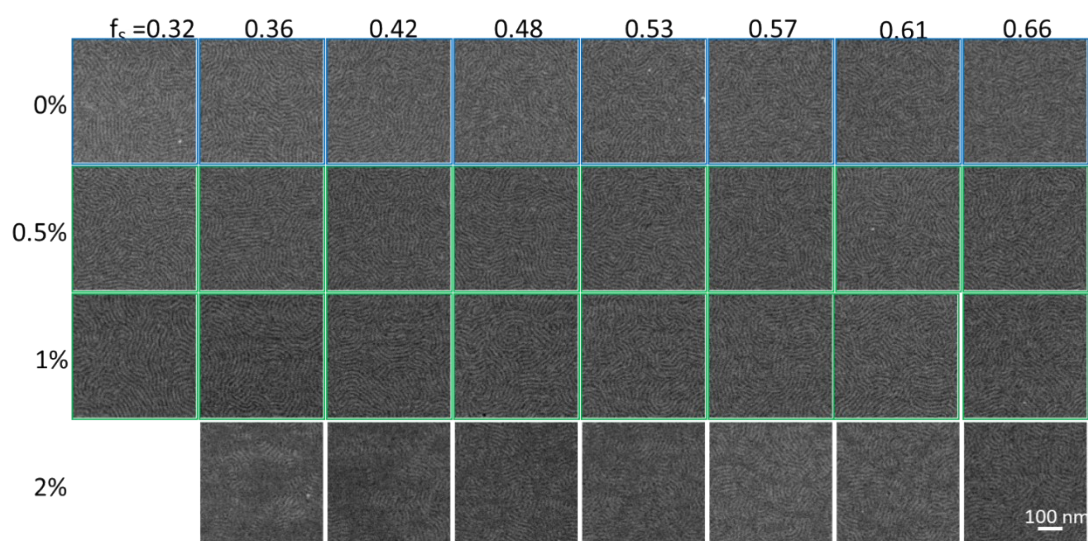

**Figure S1.** Top view SEM images after sequential infiltration synthesis (SIS) of BCPs fingerprint pattern with different weight ratios of [HMIM][PF6].  $\Phi_{IL}$  is reported as weight fraction, and  $f_s$  (PS mole ratio) shown is the composition in the P(S-*r*-2VP) random brush. (a) VSV-47 (b) SV-20 (c) VSV-26.

More SEM images of VSV-26 blending with different weight ratio IL after sequential infiltration synthesis (SIS) and O<sub>2</sub> plasma etching are shown below.

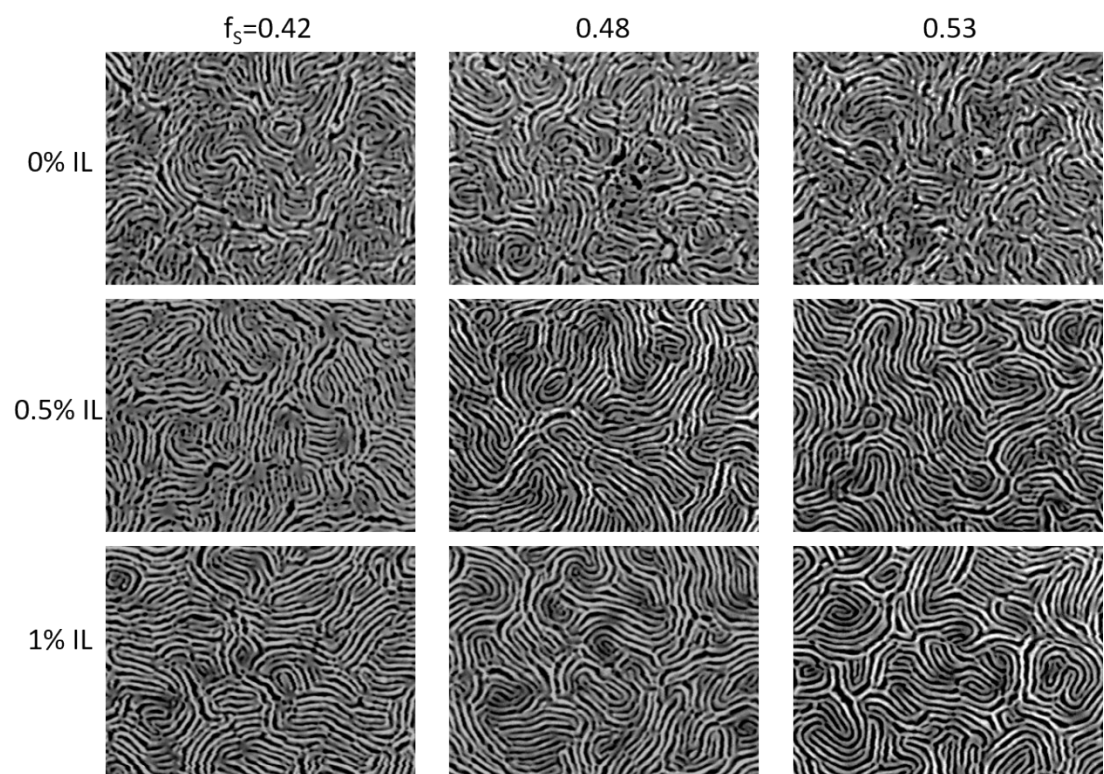

**Figure S2.** Top view SEM images of fingerprint pattern of VSV-26 blending with different weight ratio [HMIM][PF6] after sequential infiltration synthesis (SIS) and O<sub>2</sub> plasma etching annealed in acetone for 1 h, when  $f_s$  (PS mole ratio) are 0.42, 0.48, 0.53, respectively.
